# Supplementary material for: Performance assessment of sample-specific network control methods for bulk and single-cell biological data analysis
Source: PLoS Comput Biol. 2021 May 6;17(5):e1008962. doi: 10.1371/journal.pcbi.1008962 (PMC8130943; doi:10.1371/journal.pcbi.1008962)
Supplement: S5 File — (XLSX) [file pcbi.1008962.s005.xlsx]

## Sheet: Contents of S5 file
OR4F5
AL627309.1
AL627309.5
FO538757.2
FO538757.1
AP006222.1
WBP1LP7
OR4F29
CICP7
AL645608.7
SAMD11
PERM1
AL390719.1
C1orf159
LINC01342
B3GALT6
SCNN1D
ACAP3
PUSL1
DVL1
ANKRD65
FNDC10
CDK11B
SLC35E2B
MMP23A
CDK11A
CFAP74
PRKCZ
SKI
HES5
TTC34
PRDM16
ARHGEF16
WRAP73
TP73
C1orf174
AJAP1
NPHP4
KCNAB2
CHD5
GPR153
CAMTA1
SLC2A5
GPR157
H6PD
CTNNBIP1
CASZ1
VPS13D
PRAMEF4
PRAMEF29P
PRAMEF6
PRAMEF27
HNRNPCL3
PRAMEF25
PRAMEF34P
PRAMEF36P
AC245056.1
PRAMEF26
HNRNPCL4
PRAMEF9
PRAMEF13
KAZN
PLEKHM2
CROCCP2
AL137798.2
AL021920.3
CROCC
BX284668.1
RCC2
ARHGEF10L
NBL1
KIF17
HP1BP3
EIF4G3
ECE1
NBPF2P
NBPF3
PFN1P10
RAP1GAP
CELA3B
WNT4
EPHA8
EPHB2
CLIC4
RSRP1
RHD
RHCE
SELENON
FAM110D
ZDHHC18
WASF2
GMEB1
PTPRU
SDC3
ADGRB2
FNDC5
RNF19B
AL031602.1
ZNF362
PHC2
THRAP3
STK40
INPP5B
MACF1
AL031289.1
KCNQ4
HIVEP3
FOXJ3
SZT2
B4GALT2
ZSWIM5
IPP
MAST2
CYP4B1
FOXD2
AL109659.1
CALR4P
OSBPL9
ZYG11B
LRP8
GLIS1
AL603840.1
LINC01753
DAB1
C1orf87
AC099792.1
PATJ
DOCK7
ITGB3BP
AL357078.1
DNAJC6
LEPR
PDE4B
SGIP1
C1orf141
IL23R
IL12RB2
AL033530.1
LRRC7
ZRANB2-AS2
NEGR1
RPL31P12
FPGT-TNNI3K
TYW3
SLC44A5
MSH4
ST6GALNAC3
AK5
ADGRL4
LINC01362
AC104454.2
WDR63
COL24A1
HFM1
FAM69A
BCAR3
LINC01787
LRRC39
GPR88
RNPC3
AMY2A
AMY1A
AMY1B
AMYP1
AMY1C
AC092506.1
LINC01677
AL355306.2
NBPF5P
SLC25A24P2
AL390038.1
NBPF6
FAM102B
STXBP3
AL449266.1
GPSM2
KIAA1324
GSTM2
TMIGD3
RAP1A
AL445426.1
MAGI3
AC244669.1
NBPF8
AC241952.1
NBPF26
AC242852.2
AC239859.5
FP700111.1
NBPF20
NBPF12
FMO5
NBPF14
NBPF19
LINC00869
AC243772.3
HIST2H4A
HIST2H3C
HIST2H2AA3
HIST2H2AA4
HIST2H3A
HIST2H4B
HORMAD1
CTSS
POGZ
HRNR
LCE3C
LCE3B
UBE2Q1
MTX1
GBAP1
MTX1P1
GBA
GON4L
MEX3A
CCT3
IQGAP3
MNDA
AL592295.3
FCGR2C
FCGR3B
NOS1AP
PBX1
TMCO1
FAM78B
AL583804.1
POGK
ILDR2
CD247
RCSD1
ADCY10
XCL2
AL031736.1
NME7
C1orf112
KIFAP3
FMO3
SUCO
AL031599.1
PRDX6
TNN
COP1
PAPPA2
ASTN1
AL122019.1
FAM20B
AXDND1
ACBD6
XPR1
TPR
ERVMER61-1
LINC01720
AL390957.1
CDC73
DENND1B
LHX9
LINC00862
CAMSAP2
PTPRVP
PPP1R12B
PIK3C2B
RHEX
RASSF5
C4BPA
CD55
CR1
HHAT
KCNH1
FLVCR1
RPS6KC1
AC096639.1
PTPN14
KCNK2
USH2A
ESRRG
GPATCH2
LINC00210
DISP1
SUSD4
CAPN8
CNIH4
WDR26
DNAH14
ENAH
EPHX1
TUBB8P10
TUBB8P9
IBA57
AL670729.3
RNA5S1
RNA5S2
RNA5S3
RNA5S4
RNA5S5
RNA5S6
RNA5S7
RNA5S8
RNA5S9
RNA5S10
RNA5S11
RNA5S12
RNA5S13
RNA5S14
RNA5S15
RNA5S16
RNA5S17
TAF5L
PGBD5
DISC1
KCNK1
SLC35F3
NID1
GPR137B
ERO1B
ACTN2
AL359551.1
CHRM3
FMN2
GREM2
RGS7
PLD5
ZBTB18
CATSPERE
EFCAB2
KIF26B
SMYD3
CNST
LINC01341
AC113174.1
ZNF124
OR2T8
OR2T5
OR2G6
OR2T29
OR2T27
LYPD8
DIP2C
IDI1
WDR37
ADARB2
AL713851.1
PFKP
AL451164.1
MANCR
AKR1E2
AL355303.1
UCN3
IL2RA
PFKFB3
LINC00707
SFMBT2
ITIH5
ITIH2
KIN
CELF2
LINC00710
SEC61A2
CAMK1D
OPTN
MCM10
SEPHS1
BEND7
FRMD4A
FAM107B
SUV39H2
FAM171A1
ITGA8
NSUN6
MALRD1
PLXDC2
DNAJC1
COMMD3-BMI1
KIAA1217
GPR158
APBB1IP
LRRC37A6P
ARMC4
LINC01517
ZEB1
CCDC7
CREM
CCNY
FZD8
ANKRD30A
AL117337.1
ZNF33B
CSGALNACT2
RASGEF1A
WASHC2C
AGAP7P
ANTXRLP1
AGAP9
WDFY4
VSTM4
SLC9A3P1
PRKG1
PCDH15
BICC1
AC026391.1
CCDC6
ANK3
CABCOCO1
ARID5B
JMJD1C
REEP3
AC022387.1
CTNNA3
HERC4
STOX1
HKDC1
TMEM256P1
AC024601.1
PPA1
EIF4EBP2
ADAMTS14
AC073176.3
CDH23
ASCC1
P4HA1
CFAP70
ADK
ZNF503-AS1
LRMDA
KCNMA1
AC012560.1
NUTM2B
AL512662.2
NRG3
CCSER2
GRID1
BMPR1A
SHLD2
PCGF5
HECTD2
IDE
MYOF
LGI1
LCOR
AL359385.1
UBTD1
MARVELD1
HPSE2
BTRC
WBP1L
PCGF6
SH3PXD2A
SLK
RN7SL524P
SORCS3
SORCS1
LINC01435
GUCY2GP
ACSL5
TCF7L2
ADRB1
VWA2
GFRA1
SHTN1
AC005871.1
AL354863.1
ARMS2
DMBT1
LHPP
CTBP2
ADAM12
LINC00601
C10orf90
DOCK1
TCERG1L
PPP2R2D
JAKMIP3
STK32C
LRRC27
PWWP2B
AL451069.2
INPP5A
NKX6-2
CFAP46
ADGRA1
KNDC1
TUBGCP2
AL360181.3
OR6L2P
SCART1
DUX4L28
DUX4L25
DUX4L24
DUX4L23
DUX4L22
DUX4L21
DUX4L20
DUX4L29
DUX4L10
DUX4L11
DUX4L12
DUX4L13
DUX4L14
DUX4L15
OR4F2P
AC069287.1
LINC01001
IFITM2
IFITM3
B4GALNT4
PKP3
SIGIRR
ANO9
PTDSS2
HRAS
LRRC56
PHRF1
DEAF1
AP2A2
MUC2
MUC5AC
MUC5B
TOLLIP
BRSK2
DUSP8
FAM99A
MRPL23
TSPAN32
CD81
CDKN1C
SLC22A18
OSBPL5
AC109309.2
NDUFA5P1
AC123788.2
AC127526.1
AC127526.2
ART1
RRM1
SSU72P6
OR10A2
LMO1
ST5
DENND5A
ZNF143
SWAP70
AMPD3
SPON1
RRAS2
CALCB
INSC
SOX6
PLEKHA7
OR7E14P
PIK3C2A
SAA1
LDHAL6A
IGSF22
NAV2
NELL1
GAS2
AC090092.1
LUZP2
AC090592.1
ANO3
METTL15
DCDC1
ELP4
AL035078.4
CCDC73
KIAA1549L
CD44
LDLRAD3
COMMD9
PRR5L
TRAF6
RAG1
LRRC4C
HSD17B12
PRDM11
PHF21A
AC024475.4
C11orf49
SLC39A13
CELF1
PTPRJ
AC027369.6
AC027369.3
AC027369.4
AC136759.1
AC109635.5
AC024405.2
OR4C14P
OR9Q1
AP004247.2
GLYATL1
MS4A13
AP003399.1
PGA3
PGA5
LRRC10B
SYT7
ASRGL1
C11orf95
MACROD1
VEGFB
PPP1R14B
AP005273.1
NRXN2
SF1
MAP4K2
MRPL11
SPTBN2
PC
GRK2
ANKRD13D
KMT5B
LRP5
MRPL21
ANO1
SHANK2
KRTAP5-11
FAM168A
B3GNT6
GAB2
TENM4
DLG2
TMEM135
NOX4
TRIM53BP
TRIM51BP
AP005435.1
TRIM64B
AP005435.4
AP005435.2
AP005435.3
MTND1P35
TRIM49D1
TRIM49D2
AP004607.3
AP004607.7
TRIM51EP
NAALAD2
FAT3
DEUP1
SMCO4
MAML2
CNTN5
TRPC6
DYNC2H1
PDGFD
CARD16
AP003181.1
GUCY1A2
CWF19L2
RDX
ZC3H12C
ARHGAP20
NXPE1
CEP164
DSCAML1
CCDC15
FAM118B
AP001993.1
FLI1
ARHGAP32
AP002856.2
NCAPD3
GLB1L2
B3GAT1
AP004608.1
AP001999.1
AP003062.2
AC215219.1
CCDC77
B4GALNT3
ERC1
WNT5B
CACNA1C
AC092471.2
FKBP4
TEAD4
GALNT8
ANO2
SCNN1A
LRRC23
ATN1
PEX5
NANOG
SLC2A14
LINC00937
AC092865.2
OR7E140P
OR7E148P
OR7E149P
CLEC6A
AC092490.1
A2ML1
LINC02367
AC141557.1
AC092821.3
AC068775.1
KLRA1P
STYK1
PRH1
PRB2
ETV6
BCL2L14
GRIN2B
RERGL
PIK3C2G
AEBP2
AC011604.2
ST8SIA1
AC084816.1
SOX5
LRMP
LMNTD1
ITPR2
MED21
CCDC91
TMTC1
AC024940.2
DENND5B
DNM1L
PKP2
ALG10B
CPNE8
C12orf40
SLC2A13
CNTN1
PDZRN4
AC090630.1
ADAMTS20
TMEM117
NELL2
DBX2
CCNT1
AC117498.2
SPATS2
DIP2B
SLC4A8
SCN8A
KRT86
KRT81
KRT6C
TNS2
ATP5MC2
MUCL1
ERBB3
MARS
SLC16A7
FAM19A2
AC012158.1
C12orf56
RASSF3
GNS
RAP1B
LGR5
TRHDE
AC078923.1
SYT1
PTPRQ
PPFIA2
TMTC2
LRRIQ1
MGAT4C
C12orf50
LINC02391
PLEKHG7
MRPL42
SOCS2-AS1
PLXNC1
NDUFA12
FGD6
AC084879.1
PGAM1P5
NTN4
AMDHD1
AC007424.1
ANKS1B
GNPTAB
PAH
TTC41P
NFYB
C12orf45
ALDH1L2
WASHC4
C12orf75
SSH1
CCDC63
MAPKAPK5
RPH3A
AC026765.2
MED13L
NOS1
CCDC60
AC002070.1
BICDL1
RAB35
PXN
SPPL3
CAMKK2
KDM2B
TMEM120B
SETD1B
BCL7A
RSRC2
AC026333.3
HIP1R
CDK2AP1
KMT5A
RILPL1
RFLNA
NCOR2
SCARB1
UBC
DHX37
TMEM132B
AC007368.1
LINC00943
AC068787.1
LINC02369
TMEM132C
SLC15A4
GLT1D1
TMEM132D
RIMBP2
ADGRD1
AC078925.1
LINC01257
SFSWAP
ULK1
EP400
NOC4L
GALNT9
FBRSL1
POLE
ANKLE2
AL356585.3
CENPIP1
PARP4P2
MRPS31P2
IFT88
IL17D
LATS2
SKA3
LINC00327
PAN3
MTUS2
SLC7A1
HMGB1
FRY
PDS5B
KL
DCLK1
STOML3
LHFPL6
COG6
DGKH
CHCHD2P11
LINC02341
EPSTI1
TPT1-AS1
RB1-DT
RB1
LPAR6
FNDC3A
GUCY1B2
C13orf42
AL354821.1
PRR20C
PRR20D
PRR20E
LINC00358
LINC00448
LINC00383
KLHL1
DACH1
MZT1
LINC00393
LINC00392
SLAIN1
POU4F1
RBM26
NDFIP2
LINC00351
FO624990.1
LINC01049
GPC5
GPC6
UGGT2
RAP2A
STK24
DOCK9
ZIC5
TMTC4
FGF14
METTL21C
FAM155A
IRS2
COL4A2
RAB20
ANKRD10
ARHGEF7
TEX29
AL359649.1
SOX1
ATP11A
MCF2L
CUL4A
LAMP1
GRTP1
TMCO3
TFDP1
GRK1
TMEM255B
GAS6
LINC00452
RASA3
CFAP97D2
RF00002
NF1P10
DUXAP9
AL589743.5
AL589743.1
BMS1P17
POTEG
AL512310.11
OR11H2
NDRG2
ZNF219
RPGRIP1
OR6J1
AL160314.2
DHRS4
DHRS4L2
LINC02306
NOVA1
AL110292.1
PRKD1
HEATR5A
NUBPL
AKAP6
MTCO1P2
EGLN3
AL445363.3
AL445363.1
RNU1-27P
RNU1-28P
SNX6
BAZ1A
AL133304.1
MIPOL1
AL121790.2
FOXA1
MIA2
LINC00871
MDGA2
NEMF
LINC01588
TXNDC16
PSMC6
AL365295.1
LINC01500
RTN1
C14orf39
SYT16
CHURC1-FNTB
MAX
RAD51B
SYNJ2BP-COX16
RGS6
DPF3
DCAF4
HEATR4
LTBP2
JDP2
ESRRB
TMEM63C
SPTLC2
NRXN3
CEP128
GTF2A1
LINC02296
SPATA7
EML5
FOXN3
TTC7B
RPS6KA5
SLC24A4
GOLGA5
ITPK1
CLMN
AK7
AL355097.1
CCNK
CCDC85C
EML1
EVL
WDR25
BEGAIN
LINC02320
PPP2R5C
TECPR2
ANKRD9
TRAF3
CDC42BPB
EXOC3L4
TNFAIP2
EIF5
AL590079.1
TMEM179
INF2
AKT1
ZBTB42
CEP170B
PLD4
JAG2
BRF1
BTBD6
PACS2
TEX22
IGHG2
IGHGP
IGHJ4
IGHJ3
IGHJ2P
IGHJ2
IGHJ1
IGHD7-27
IGHJ1P
IGHD1-26
IGHD6-25
IGHD5-24
IGHD4-23
IGHD3-22
AC246787.2
IGHD1-20
IGHD6-19
IGHD5-18
IGHD4-17
IGHD3-16
IGHD2-15
IGHD1-14
IGHD6-13
IGHD5-12
IGHD4-11
IGHD1-7
IGHD6-6
IGHD5-5
IGHD4-4
IGHD3-3
IGHD2-2
FAM30A
IGHV4-4
IGHV7-4-1
IGHV3-69-1
IGHV1-69-2
AC245369.1
AC134980.3
AC025884.2
AC011767.1
GOLGA6L1
GOLGA8EP
AC242376.1
AC242376.2
GOLGA8S
GOLGA6L2
UBE3A
LINC02248
GABRB3
GABRG3
MIR4509-2
AC091304.10
AC138749.4
MIR4509-3
GOLGA8G
AC138749.3
HERC2P9
AC055876.2
GOLGA8M
FAM189A1
TJP1
AC111152.1
GOLGA8J
GOLGA8T
FAN1
OTUD7A
CHRNA7
AC139426.1
AC139426.2
GOLGA8K
AC135983.2
GOLGA8N
FMN1
RYR3
GOLGA8A
DPH6
DPH6-DT
AC013652.1
MGA
HAUS2
CATSPER2
CKMT1A
STRCP1
TRIM69
AC090527.2
AC073941.1
SEMA6D
FBN1
ATP8B4
MIR4713HG
TNFAIP8L3
MAPK6
UNC13C
RAB27A
DNAAF4
RFX7
AC090517.4
TCF12
GCOM1
ADAM10
MYO1E
FAM81A
AC009654.1
RORA
VPS13C
TLN2
RBPMS2
PARP16
IGDCC4
RAB11A
MEGF11
TIPIN
SMAD3
MAP2K5
PIAS1
ITGA11
CORO2B
GLCE
AC026992.1
PAQR5
DRAIC
THSD4
MYO9A
C15orf59
C15orf59-AS1
SCAMP5
PPCDC
GOLGA6C
GOLGA6D
PTPN9
TSPAN3
AC046168.2
LINGO1
ADAMTS7P3
TBC1D2B
ADAMTS7
TMED3
ABHD17C
HOMER2
C15orf40
GOLGA6L4
DNM1P51
AC048382.4
SLC28A1
CSPG4P12
GOLGA6L3
ADAMTS7P4
AGBL1
AC020687.1
ACAN
LINC00928
ZNF710
CRTC3
FURIN
SV2B
SLCO3A1
FAM174B
CHD2
FAM169B
DNM1P46
AC090825.1
ADAMTS17
CERS3
AC087762.1
LRRK1
CHSY1
PCSK6
TARSL2
DNM1P47
HBM
HBA2
Z69706.1
PDIA2
AXIN1
TMEM8A
NME4
RAB11FIP3
CAPN15
PIGQ
RAB40C
METRN
LMF1
SSTR5-AS1
CACNA1H
TPSB2
TPSAB1
UBE2I
BAIAP3
UNKL
HAGH
SLC9A3R2
TSC2
PKD1
PGP
CCNF
PDPK1
AC141586.1
AC141586.2
AC004233.1
ZNF200
ZSCAN32
CREBBP
ADCY9
GLIS2
SEC14L5
RBFOX1
PMM2
USP7
AC022167.3
GRIN2A
AC099489.1
LITAF
SNN
NPIPB2
SHISA9
U91319.1
PLA2G10
NPIPA3
AC136443.1
NPIPA2
NPIPA1
PDXDC1
ABCC1
AC138969.1
AC138969.2
NPIPA7
AC092326.1
XYLT1
NPIPA8
AC126755.6
AC126755.2
NOMO2
SYT17
ACSM2B
NPIPB3
NPIPB4
NPIPB5
HS3ST2
USP31
SCNN1B
DCTN5
PRKCB
HS3ST4
GSG1L
AC020765.3
SULT1A1
AC145285.4
EIF3C
SH2B1
NPIPB11
BOLA2
NPIPB12
NPIPB13
ITGAM
AC145350.2
TP53TG3C
AC141257.2
TP53TG3E
AC141257.3
TP53TG3B
AC141257.1
AC141257.4
TP53TG3F
AC136944.6
FP325313.1
SIAH1
LINC02128
AC025810.1
AC007333.1
TOX3
CES1P1
CES1
AMFR
NUP93
CSNK2A2
LINC02137
CNOT1
LINC02141
CDH8
AC138305.1
AC009055.1
LINC00922
CMTM4
AC009022.1
CLEC18C
MTSS1L
ZFHX3
AC138627.1
GLG1
AC099508.2
CTRB2
CTRB1
AC099511.1
CNTNAP4
WWOX
MAF
CDYL2
AC092718.8
ATMIN
CDH13
NECAB2
ATP2C2
GSE1
AC092723.4
LINC01081
AC092720.1
JPH3
KLHDC4
AC126696.1
BANP
AC138512.1
ZFPM1
GALNS
CBFA2T3
LINC00304
ANKRD11
CPNE7
CHMP1A
CDK10
LINC02166
FANCA
SPIRE2
TCF25
DEF8
FAM157C
AC240565.2
AC240565.1
DOC2B
RPH3AL
VPS53
GEMIN4
DBIL5P
NXN
ABR
AC144836.1
PITPNA
SGSM2
RAP1GAP2
OR3A2
ZZEF1
ARRB2
MINK1
AC007846.2
ALOX12P2
CHD3
STX8
SHISA6
DNAH9
COX10-AS1
ADORA2B
MPRIP
NT5M
DRG2
LLGL1
KRT17P5
KRT16P4
TBC1D28
GRAP
SNORD3B-2
AC007952.3
AC007952.7
AC007952.2
AC007952.4
GRAPL
AC007952.5
AC007952.8
SNORD3C
AC106017.1
EPN2
AKAP10
LGALS9B
NCOR1P2
AC209154.2
AC005697.1
GIT1
ANKRD13B
SSH2
AC005562.1
AC005562.2
RAB11FIP4
AC090616.2
AC090616.5
CDK5R1
TMEM132E
TBC1D3B
TBC1D3I
TBC1D3G
TBC1D3H
TBC1D3F
TBC1D3J
GGNBP2
ACACA
DUSP14
TBC1D3K
TBC1D3L
TBC1D3D
TBC1D3C
AC233968.1
TBC1D3E
RNA5SP526
TBC1D3
AC244154.1
MRPL45
ARHGAP23
FBXO47
CDK12
WIPF2
KRTAP9-8
KRTAP9-6
KRTAP9-11P
KRTAP9-7
KRT42P
HAP1
STAT3
PTGES3L-AARSD1
LINC00854
PYY
FAM171A2
GPATCH8
GJC1
DCAKD
NMT1
LRRC37A4P
MAPT
KANSL1
ARL17B
LRRC37A
NSFP1
AC138645.1
LRRC37A2
ARL17A
WNT3
CBX1
SUMO2P17
GIP
B4GALNT2
XYLT2
TOB1-AS1
CA10
SMIM36
ANKFN1
CUEDC1
BCAS3
TBX2
MED13
EFCAB3
MAP3K3
ERN1
PLEKHM1P1
PRKCA
PITPNC1
NOL11
C17orf58
FAM20A
AC079210.1
KCNJ16
CASC17
SOX9-AS1
LINC02097
COG1
LLGL2
UNK
SRP68
RNF157
SEPT9
AC021683.2
TMC6
DNAH17
CYTH1
TIMP2
CBX2
TBC1D16
RNF213
RPTOR
CHMP6
CEP131
BAHCC1
NPLOC4
TSPAN10
PDE6G
MCRIP1
ALYREF
ANAPC11
MAFG
NOTUM
RAC3
CCDC57
OGFOD3
CYBC1
FOXK2
RAB40B
TBCD
B3GNTL1
METRNL
AC139099.4
AC139099.3
RPL23AP87
LINC02564
ROCK1P1
THOC1
COLEC12
LINC01925
TYMS
AC019183.1
AP005230.1
DLGAP1
ZBTB14
EPB41L3
L3MBTL4
LINC01387
PTPRM
RAB12
ANKRD12
PPP4R1
RAB31
AP005209.1
PIEZO2
NPIPB1P
GNAL
TUBB6
AFG3L2
LDLRAD4
FAM210A
ANKRD30B
AP005242.1
ROCK1
CABLES1
TTC39C
LINC01894
TAF4B
CHST9
DSC1
CCDC178
ASXL3
MAPRE2
GALNT1
CELF4
AC016205.1
LINC01478
SLC14A2
HAUS1
RNF165
KATNAL2
ELOA3D
ELOA3C
ELOA3B
ELOA3
SMAD2
CTIF
DYM
LIPG
MYO5B
LINC01630
DCC
MBD2
TCF4
NEDD4L
ZNF532
AC105094.2
PIGN
ZCCHC2
PHLPP1
CDH7
CCDC102B
DOK6
AC090398.1
TSHZ1
ZNF516
LINC00908
ZNF236-DT
ZNF236
MBP
SALL3
ATP9B
NFATC1
CTDP1
AC021594.2
KCNG2
OR4F17
AC010507.1
LINC01002
PLPP2
MIER2
SHC2
MADCAM1
CDC34
HCN2
PLPPR3
ELANE
CNN2
SBNO2
STK11
CBARP
DAZAP1
MEX3D
TCF3
ONECUT3
KLF16
CSNK1G2
BTBD2
AP3D1
LMNB2
AC006538.2
ZNF57
TLE2
AES
GNA11
S1PR4
NFIC
PIP5K1C
TJP3
PIAS4
ZBTB7A
AC011498.1
KHSRP
C3
ADGRE4P
MBD3L2B
MBD3L5
MBD3L4
MBD3L2
MBD3L3
CAMSAP3
CLEC4M
ELAVL1
CCL25
HNRNPM
AC012616.1
CARM1
DOCK6
CCDC151
NFIX
NACC1
CACNA1A
SAMD1
PKN1
ADGRE2
NOTCH3
BRD4
WIZ
CYP4F23P
CYP4F12
JUND
CRLF1
CERS1
GATAD2A
ZNF626
ZNF208
ZNF730
ZNF675
AC139769.1
AC139769.2
AC006504.7
AC005394.2
UQCRFS1
AC008798.1
LRP3
KIAA0355
WTIP
USF2
GPR42
KMT2B
AC012617.1
ZNF850
AC016590.1
ZNF573
RYR1
LGALS7
LGALS7B
PAK4
FCGBP
LTBP4
CYP2A6
CYP2F1
CEACAM3
CIC
CEACAMP5
PSG7
PSG9
CD177
CD177P1
CADM4
AC245748.1
CEACAM22P
CEACAM19
CBLC
RELB
NOVA2
MEIS3
ZSWIM9
CARD8
GRIN2D
MYH14
KCNC3
KLK6
AC018755.2
ZNF534
ZNF83
ZNF611
ZNF665
MYADM
CACNG8
TARM1
RPS9
LILRB3
CDC42EP5
LILRP2
EPS8L1
PPP1R12C
PTPRH
AC010327.4
TMEM238
RPL28
SBK2
NLRP4
ZNF787
ZSCAN5A
ZNF667
ZNF71
ZNF835
ZNF814
ZSCAN22
ZBTB45
TRIM28
CENPBD1P1
AC079779.2
AC079779.3
AC079779.4
TMEM18
LINC01115
SNTG2
TPO
PXDN
MYT1L
AC018685.2
EIPR1
DCDC2C
MIR7515HG
KIDINS220
ASAP2
ITGB1BP1
KLF11
PQLC3
GREB1
MIR3681HG
LINC00276
AC130710.1
KCNS3
GDF7
KLHL29
ATAD2B
DNMT3A
DTNB
KIF3C
DRC1
KCNK3
BABAM2
PLB1
ALK
LCLAT1
SRD5A2
DPY30
SPAST
BIRC6
LINC00486
LTBP1
LINC01317
AC068599.1
AC012593.1
ATL2
DHX57
SLC8A1
PKDCC
KCNG3
MTA3
THADA
CAMKMT
SRBD1
PRKCE
RHOQ
TTC7A
STON1-GTF2A1L
NRXN1
AC007402.1
AC010967.1
ACYP2
MTIF2
LINC01122
AC007100.1
FAM161A
SPRED2
AC007389.3
LINC01828
AC010913.1
C2orf78
AC073046.1
LRRTM4
CTNNA2
AC012355.1
TRABD2A
KCMF1
TCF7L1
AC093162.2
RNF103-CHMP3
RGPD1
AC092651.1
AC083899.1
RGPD2
RNU2-63P
FOXI3
RPIA
IGKV2-40
AC006453.4
AC006453.2
AC006453.1
IGKV1D-12
KCNIP3
ANKRD36C
IGKV1OR2-9
IGKV2OR2-10
IGKV2OR2-7D
IGKV2OR2-7
IGKV2OR2-8
IGKV1OR2-11
AC092683.1
AC092683.2
MGAT4A
TSGA10
LYG2
AFF3
PDCL3
MAP4K4
IL18R1
POU3F3
MRPS9
NCK2
RGPD3
RGPD4
SH3RF3
AC074387.1
RGPD5
RGPD6
TMEM87B
FBLN7
TTL
IL1A
IL1RN
DPP10
SCTR
CFAP221
GLI2
CNTNAP5
MAP3K2
WDR33
SAP130
UGGT1
HS6ST1
POTEF
MZT2B
TUBA3E
POTEI
CFC1B
PRSS40B
PRSS40A
ARHGEF4
PLEKHB2
AC073869.3
C2orf27A
C2orf27B
MGAT5
TMEM163
THSD7B
LRP1B
GTDC1
MBD5
AC023469.1
NEB
FMNL2
GALNT13
LINC01876
ACVR1
UPP2
LY75-CD302
PLA2R1
SLC4A10
FIGN
AC016766.1
SCN7A
XIRP2
CERS6
ABCB11
KLHL23
MYO3B
SLC25A12
HAT1
METAP1D
OLA1
CIR1
AGPS
PDE11A
TTN
UBE2E3
LINC01934
ITGA4
CALCRL
LINC01090
MFSD6
MYO1B
TMEFF2
TRAK2
STRADB
CDK15
PARD3B
CREB1
METTL21A
MAP2
ERBB4
IKZF2
SPAG16
AC012668.3
AC019211.1
AC010980.1
ACSL3
CUL3
DOCK10
COL4A3
C2orf72
DIS3L2
NGEF
INPP5D
DGKD
MROH2A
ARL4C
SH3BP4
AGAP1
IQCA1
MLPH
AC012485.2
HDAC4
GPC1
AC110619.1
ANKMY1
RNPEPL1
AQP12B
AQP12A
CROCC2
ANO7
SEPT2
BOK
THAP4
D2HGDH
RTP5
AC093642.2
LINC01880
TRIB3
RBCK1
TCF15
PSMF1
AL049634.2
EBF4
PTPRA
CENPB
RNF24
SMOX
ADRA1D
CASC20
AL096799.1
PAK5
SLX4IP
AL109837.2
MACROD2
KIF16B
PCSK2
DTD1
SLC24A3
CRNKL1
INSM1
XRN2
AL109954.1
CST13P
FRG1CP
FRG1DP
RF00002
[truncated: 1,993 more rows]
